# Supplementary material for: Brahma Related Gene 1 (Brg1) Regulates Cellular Cholesterol Synthesis by Acting as a Co-factor for SREBP2
Source: PubMed Central journal article supplement (PMC7243037; doi:10.3389/fcell.2020.00259), 2020-05-15
Supplement: Data_Sheet_1.pdf [file Data_Sheet_1.pdf]

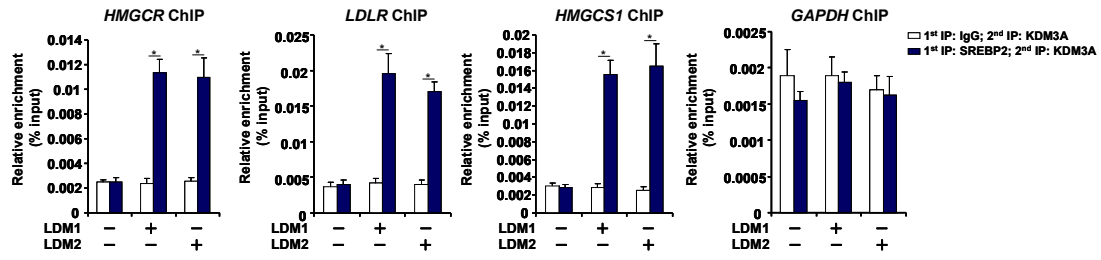

**Figure S1:** HepG2 cells were cultured in LDM1 or LDM2 for 24 hours. Nuclear lysates were extracted and Re-ChIP was performed with indicated antibodies.

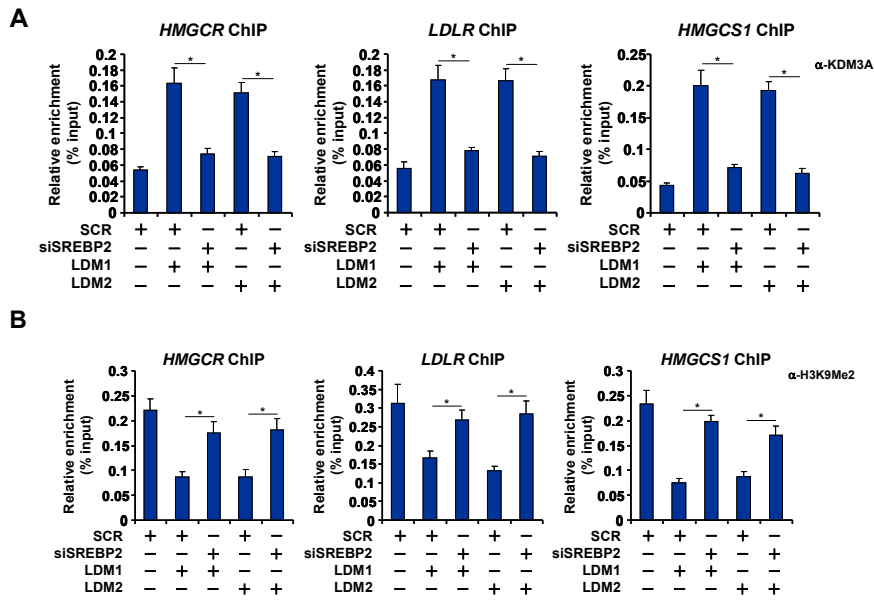

**Figure S2:** HepG2 cells were transfected with siRNA targeting SREBP2 or SCR and exposed to LDM1 or LDM2. ChIP assays were performed with anti-KDM3A (A) or anti-H3K9Me2 (B).
